# Supplementary material for: Neonicotinoid insecticide sulfoxaflor in the environment: a critical review of environmental fate, degradation mechanism, and toxic effects
Source: Royal Society of Chemistry journal article supplement (doi:10.1039/d4em00798k), 2025-01-01

## Supplementary material

### **Neonicotinoid insecticide sulfoxaflor in the environment: A critical review of environmental fate, degradation mechanism, and toxic effects**

Yun-Xiu Zhao <sup>a#</sup>• Yue Shen <sup>b#</sup>• Li-Wen Chen <sup>b#</sup>• Jing Li <sup>b\*\*</sup>• Ju-Yang <sup>b\*</sup>

<sup>a</sup>Jiangsu Key Laboratory for Bioresources of Saline Soils, Jiangsu Synthetic Innovation Center for Coastal Bio-agriculture, School of Wetlands, Yancheng Teachers University, Yancheng 224007, People's Republic of China

<sup>b</sup>College of Marine and Biological Engineering, Yancheng Teachers University, Yancheng 224002, People's Republic of China

Figure S1 A summary diagram comparing the toxicological effects of SUL across different organisms (e.g., bees, aquatic organisms, mammals)

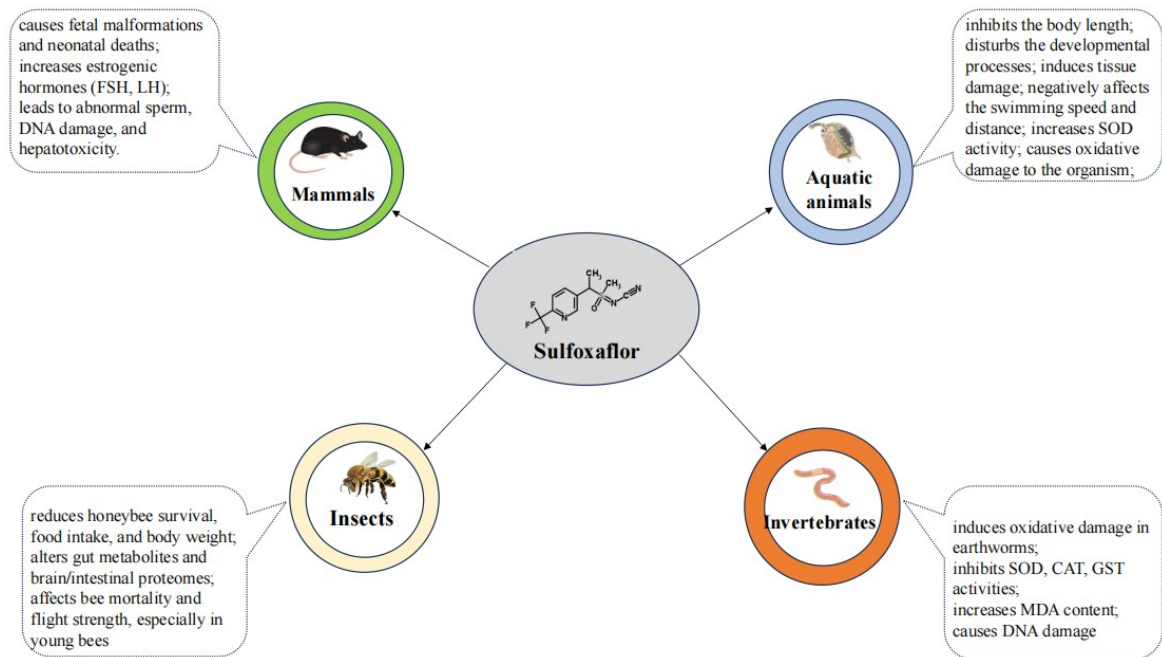

Supplement: d4em00798k1.pdf [file d4em00798k1.pdf]
